# Supplementary material for: The correlations of the electronic structure and film growth of 2,7-diocty[1]benzothieno[3,2-b]benzothiophene (C8-BTBT) on SiO2
Source: Royal Society of Chemistry journal article supplement (doi:10.1039/c6cp06919c), 2016-12-20
Supplement: c6cp06919c1.pdf [file c6cp06919c1.pdf]

## **Electronic Supplementary Information**

### **The correlations of the electronic structure and film growth of 2,7-diocty[1]benzothieno[3,2-b]benzothiophene (C8-BTBT) on SiO<sub>2</sub>**

Lu Lyu,<sup>abc</sup> Dongmei Niu,<sup>\*ab</sup> Haipeng Xie,<sup>ab</sup> Yuan Zhao,<sup>ab</sup> Ningtong Cao,<sup>ab</sup>

Hong Zhang,<sup>ab</sup> Yuhe Zhang,<sup>ab</sup> Peng Liu,<sup>ab</sup> and Yongli Gao,<sup>\*abd</sup>

*<sup>a</sup>Institute of Super-microstructure and Ultrafast Process in Advanced Materials, School of Physics and Electronics, Central South University, No. 605 Lushan South Road, Changsha Hunan, 410012, P. R. China*

*<sup>b</sup>Hunan Key Laboratory for Super-microstructure and Ultrafast Process, School of Physics and Electronics, Central South University, Changsha, Hunan, 410012, P. R. China*

*<sup>c</sup>Department of Physics and Research Center OPTIMAS, University of Kaiserslautern, Erwin-Schrödinger-Straße 46, 67663 Kaiserslautern, Germany*

*<sup>d</sup>Department of Physics and Astronomy, University of Rochester, Rochester, NY14627, USA*

*\* E-mail: [mayee@csu.edu.cn](mailto:mayee@csu.edu.cn)*

*\* E-mail: [ygao@csu.edu.cn](mailto:ygao@csu.edu.cn)*

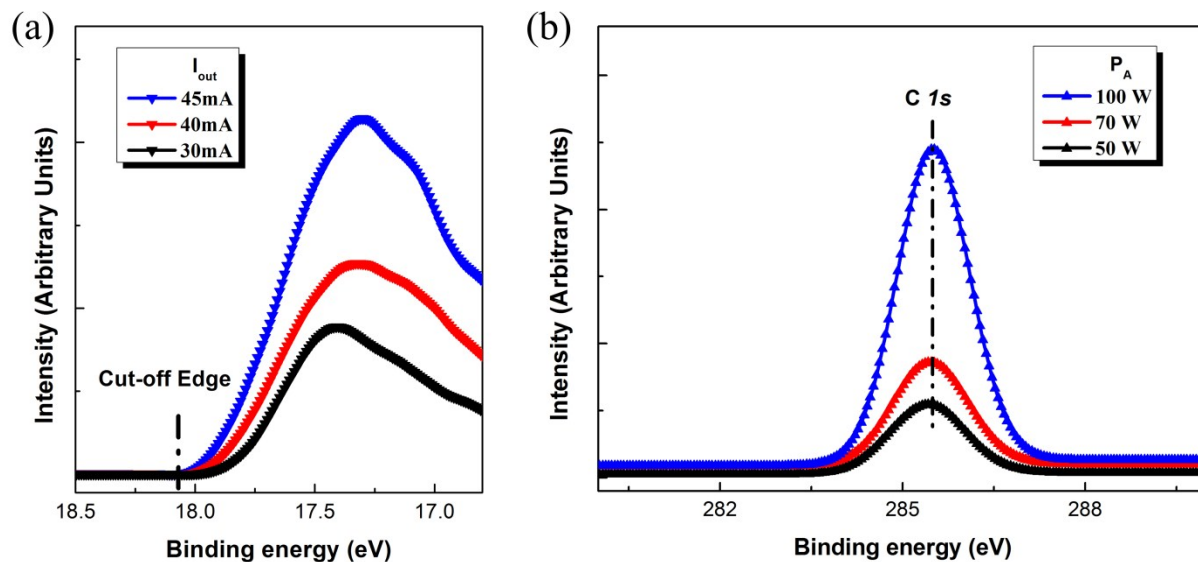

**Fig. S1** (a) UPS cut-off region of 8.0 nm C8-BTBT on SiO<sub>2</sub> at different out current ( $I_{out}$ ) of UV lamp and (b) XPS C 1s core-level at different anode power dissipation ( $P_A$ ) of X-ray.

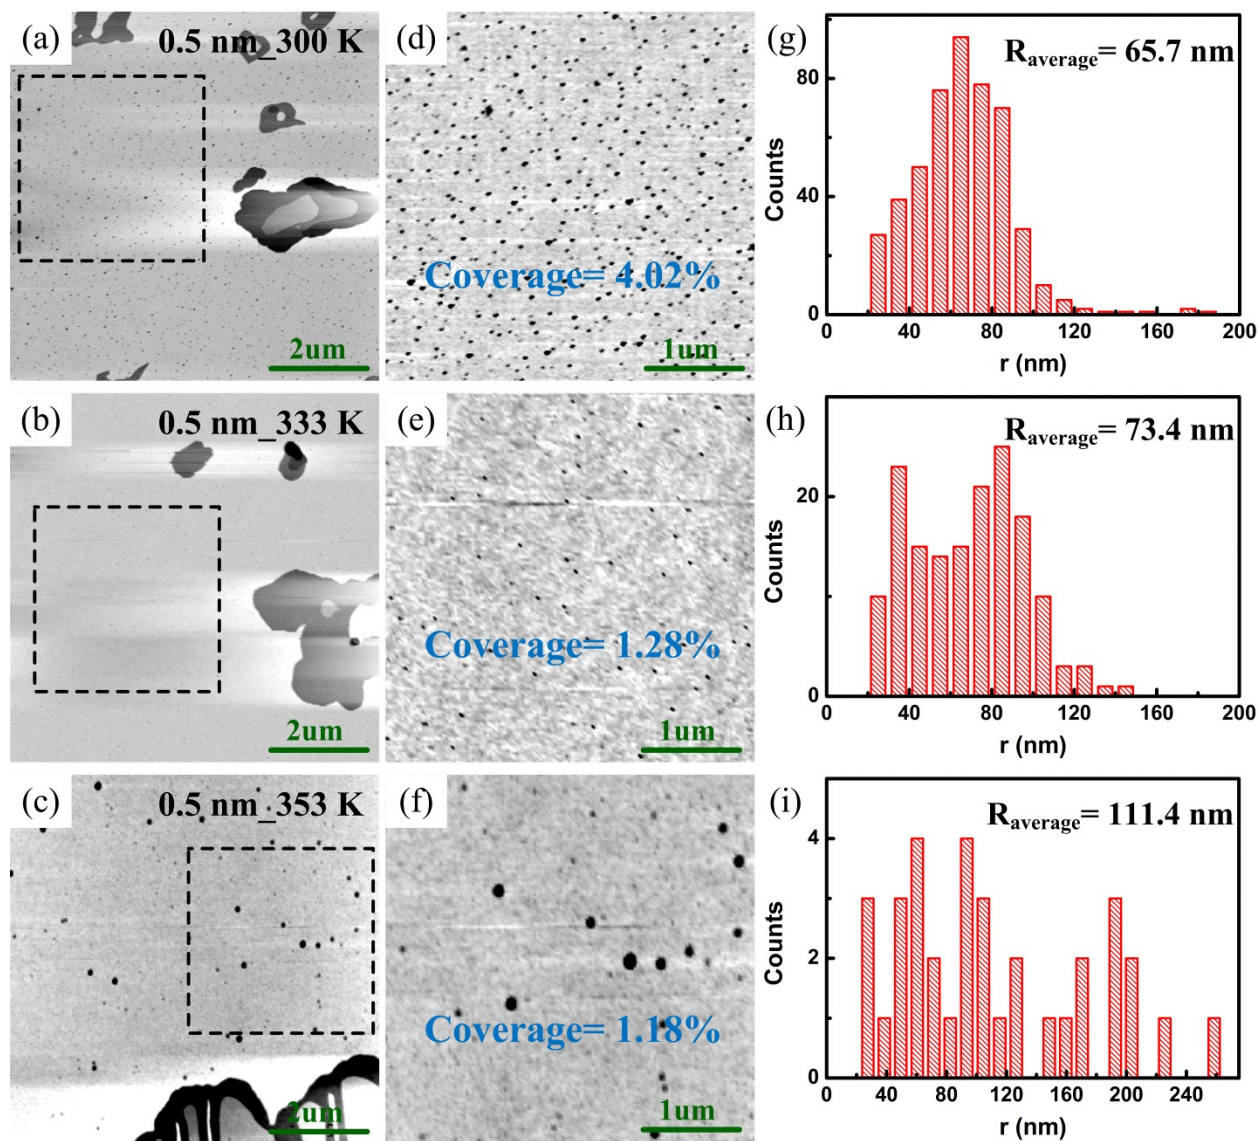

**Fig. S2** AFM morphology images ( $10 \mu\text{m} \times 10 \mu\text{m}$ ) of 0.5 nm-thick C8-BTBT films on SiO<sub>2</sub> as a function of substrate temperature of (a) 300, (b) 333, (c) 353 K. (d)-(f) are the corresponding magnified image ( $5.0 \mu\text{m} \times 5.0 \mu\text{m}$ ) from the crystallites region indicated by black dashed square in (a)-(c). The histograms of (g), (h) and (i) show the radius distribution of crystallites in (d), (e) and (f), respectively.
